# Supplementary material for: WW domain-mediated interaction with Wbp2 is important for the oncogenic property of TAZ
Source: PubMed Central journal article supplement — Oncogene. 2010 Oct 25;30(5):600–10. doi: 10.1038/onc.2010.438 (PMC3033532; doi:10.1038/onc.2010.438), 2010-10-25

Figure S1

```

WBP2 (human) : MALNKNHSEGG-GVIVNNTESIILMSYDHVELTFNDMKNVPEAFKGTKKCTVYLTPIYRVIFLS-RGKIDAMQSFMMPFYLMKDCEIKQPVFGANYIKGTVKA : 98
WBP2-a (zebrafish) : MALNKNHDESG-RVIINNFEGVILMSYENVELVPSDSERLDPDAFRKSKKGSYLTPIYRVIFLT-RGKIDPLQSFMMPFYLMKGCCEIKQPVFGANYIKGTVGA : 98
WBP2-b (zebrafish) : MALNLRNHPNG-GVLIQAGEIILRECKNVELSFDVTPKNDLFKCTKKGSVYLTQYRVLVFSVSMKEKFCSEMFPFYLMKNCSEIKQPVFSANFIQGLIKA : 99
WBP2-a (frog) : MSLNRNHLDDG-GAMINNSESVLTSYEHVELLSDMESTSEAFRGTKKGRVILTPIYRVIFVS-RGRDPMQSFMMPFYLMKDCEIKQPVFGANFIKGTVRA : 98
WBP2-b (frog) : MALNLRNHLDDG-GAVINNSESVLTSYEHVELTFSMDSTPEAFRGTKKGRVILTPIYRVIFVS-RGRDPMQSFMMPFYLMKDCEIKQPVFGANFIKGNVRA : 98
WBP2-b (c.elegan) : MSINTANTPDGLGVLLYNGEIVIFAQGVHTLGTSE--NENLEGRRTGTIYLTSHRIIFMFD-PGWLKSEFI PFNSMDVNLNQPIFGANYICGIASA : 97
WBP2-b (drosophila) : MSVNTAHANN--GVLLHAGEYIILHSDSVSMEFSQGD--NPIFKSKRGGRIYLTSHRMIFNSKKSSDSMQSESAPEVALSDVEIKQPVFGANYIKGTVRA : 96

WBP2 (human) : BAGGGWEGSASYKLIPTAGGAIETGQRMILQVASSASRGVEVPSG-AYGYSYMPSG--AVYVPPP-VANGMYFC--PP-GYPYP--PPPPEFYEGPMMDG- : 188
WBP2-a (zebrafish) : ESGGGWEGSATFKLIFSAGGAIETGQRMILHVAEQASRGQPVTV-NFGCPYMANG--AYAFPPP-PANGMYFAGPPPGYTYEGPPPGGEGYSPVFDG- : 194
WBP2-b (zebrafish) : BAGGGWEGQAGFKLSFPSGGAIETLGOHLFKLATNASRAPPANQNGAFLAAGMNGYASPAHPQYYPSPMPQA--PYSQYPIYA--PAAGVYBSAPV--- : 190
WBP2-a (frog) : EPGGGWEGSATFKLSFPSGGAIETGQRMILVASSASRG--TPS---VAYPYMPNG--GYVPPP-AANGIYPP--PPAGYYP--PPPSEFYTGAVAQDG- : 186
WBP2-b (frog) : EPGGGWEGSATFKLSFPSGGAIETGQHMLHVAEQASSGGAPN--VAYPYMPNG--GYVPPP-AANGIYPP--PPAGYYP--PPPSEFYSGAAAQGG- : 187
WBP2-b (c.elegan) : VQGGQMRGSEVKNRMTFNRRGGCIEFGQSLLQAVRAVR--MR-----PENNA--PPAYSPP--IGDFYSA--PPAYYQPSPDQGENGENFTTDSFDDQ : 180
WBP2-b (drosophila) : QPNCNYVGEVVKFKLHFKAGGAIETGQALLRSAKTAMNNYHRG---GL--AGDD--PPYQP--AGSWNEA--PPAYQFPP--GYVWLEQHDFAEFG- : 180

WBP2 (human) : ---AMGYVQPPPPPYPGFMEIP-VSGPDVPTDA-----AEAKAAEAAASAYINPG-NPHNVYMTSQ----- : 246
WBP2-a (zebrafish) : ---PAAVM--PPPYTAFVDHA-PLDPLRPTAA-----AEAKAAEAAASSANTTYAPTHVYLPEDK----- : 251
WBP2-b (zebrafish) : ---YMA-PPPYPGFPQD---WAALPVAF-----ANAKAAEAAASSAFYNPS-NPHSVYMSDL----- : 240
WBP2-a (frog) : ---SLTYMHPPPPPYPGFMEIPPSACAPDLPTFA-----AEAKAAEAAASGYYSQQ-NPPhSYMPDL----- : 244
WBP2-b (frog) : ---SLTYMHPPPPPYPGFMEIPPSACAPDLPTFA-----AEAKAAEAAASGYYSQQ-NPPhSYMPDL-----P : 247
WBP2-b (c.elegan) : PNPSSRVFMS SAPPYPGIGP-----ERGPHTTEELHVAGQ : 215
WBP2-b (drosophila) : PAPTNYMSDNPPYPGIADPAHQPAQQQQAQSSNEPNWYGFSAPPPQQQQQPCYV-----PQGWAGG : 245

WBP2 (human) : -PPPPYYPPE--DKKTQ----- : 261
WBP2-a (zebrafish) : -PPPYSPSD--DKKNQ----- : 264
WBP2-b (zebrafish) : -PPPYFPENPEKKN----- : 255
WBP2-a (frog) : -PPPPYFPE--DKKKQ----- : 259
WBP2-b (frog) : -PPPYFPE--DKKTQ----- : 261
WBP2-b (c.elegan) : FEAPPAYGSGETADGLRRRN----- : 235
WBP2-b (drosophila) : YVQPPYASCAFNCPQPPYAAPAQTYNGPQPYGGYGNVPGGENTPGFQQRNGNENGYPGGPPPPGQQAAGAAGAAASGASPMGFSLPPGTNYCTSNSH : 345

WBP2 (human) : ----- : -
WBP2-a (zebrafish) : ----- : -
WBP2-b (zebrafish) : ----- : -
WBP2-a (frog) : ----- : -
WBP2-b (frog) : ----- : -
WBP2-b (c.elegan) : ----- : -
WBP2-b (drosophila) : PDNSQIRQHPSLFLSNKTHVCCAGSFDFTVINYSKEAEAAASAYNT PYNQGGPSGSGNNDLPPSYNNLPPSYDDASKKNH---- : 427

```

Figure S2

A

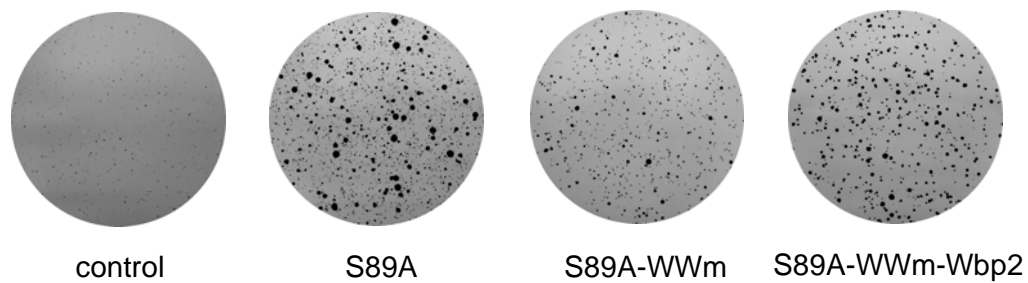

B

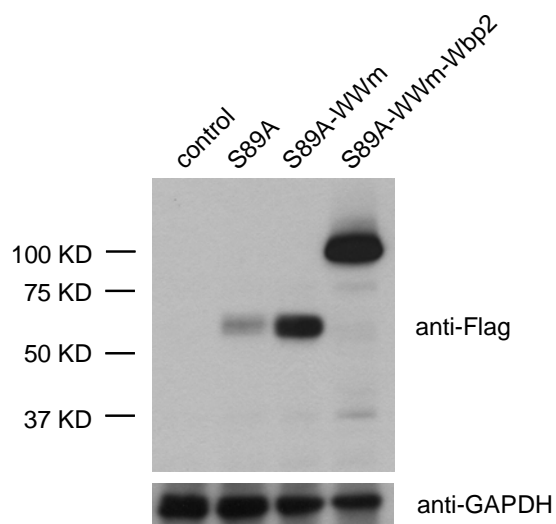

Figure S3

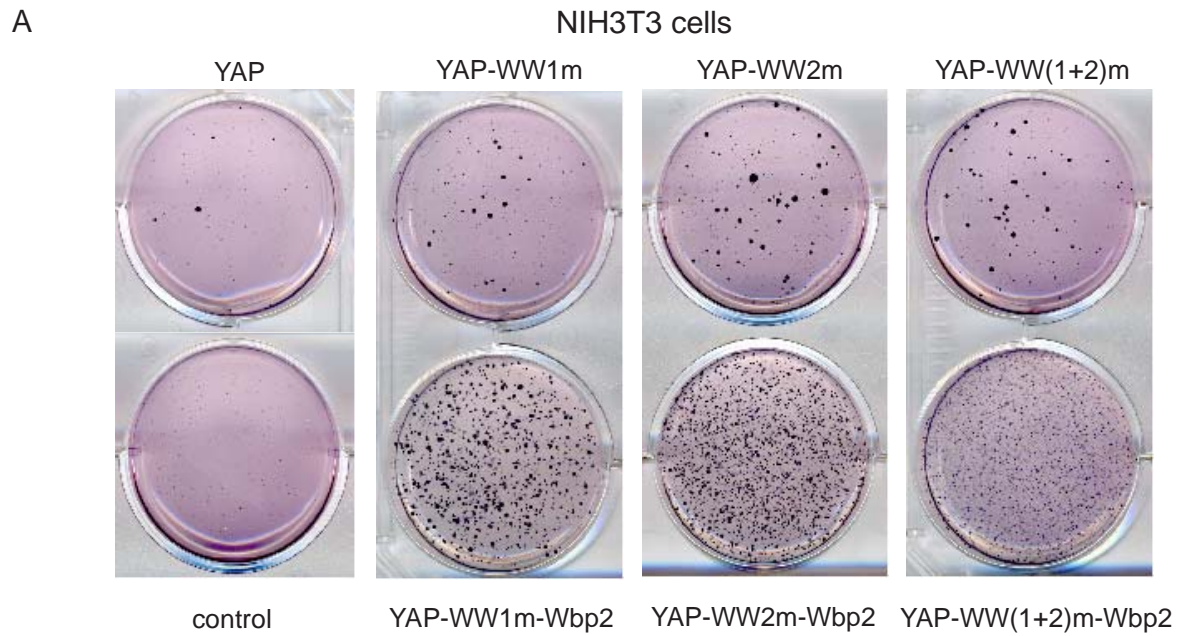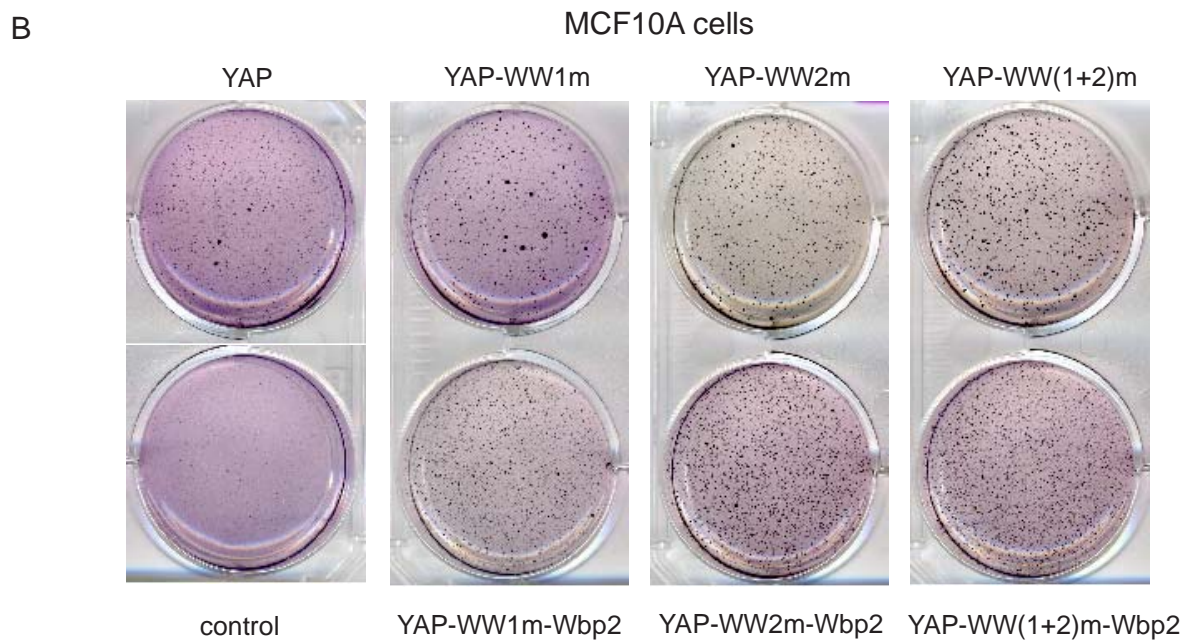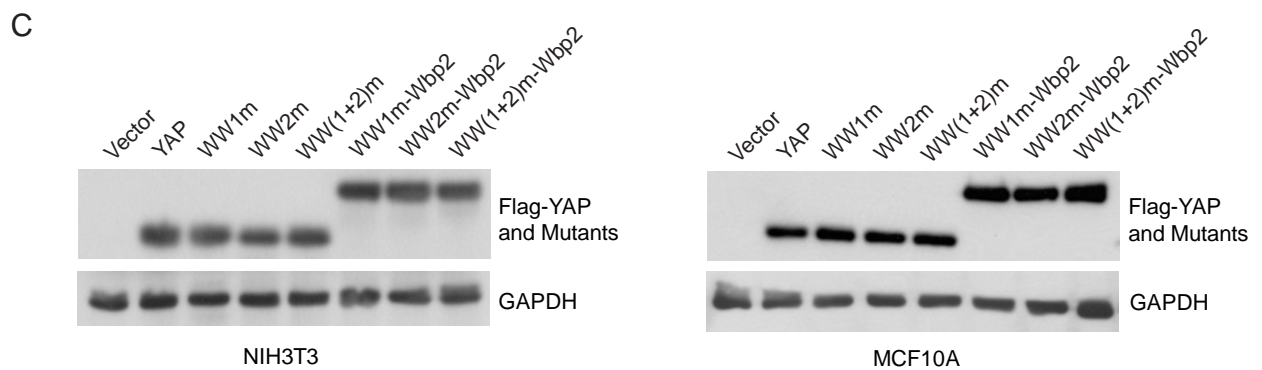

Figure S4

A

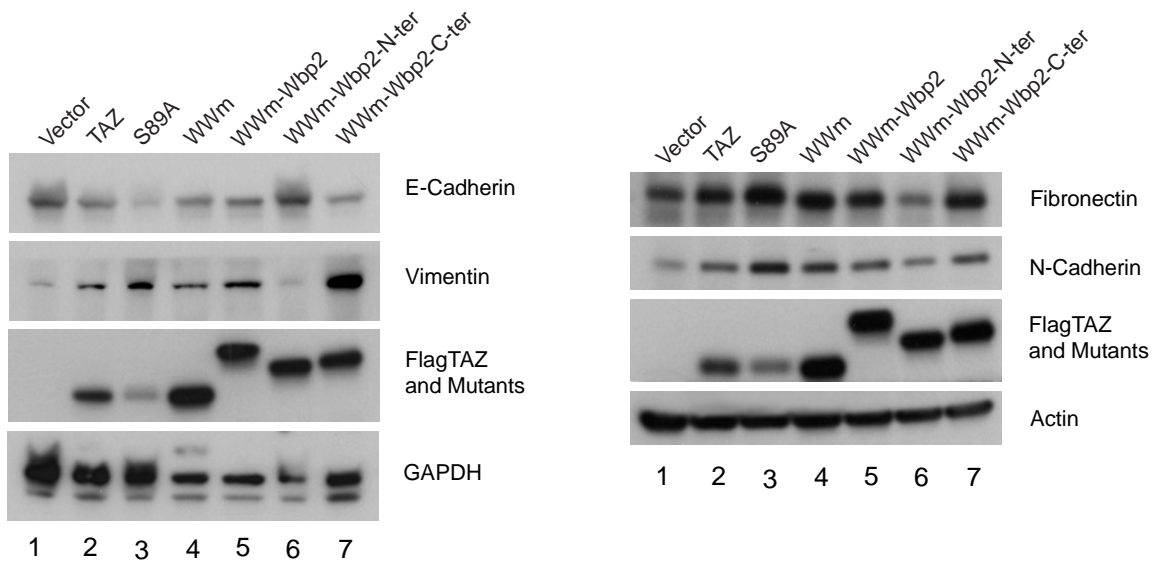

B

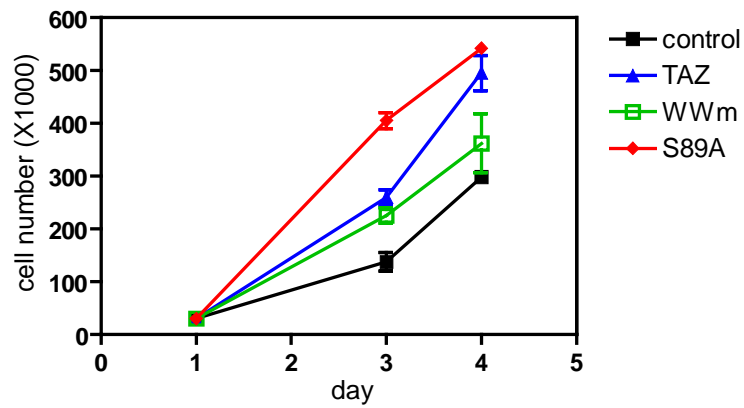

C

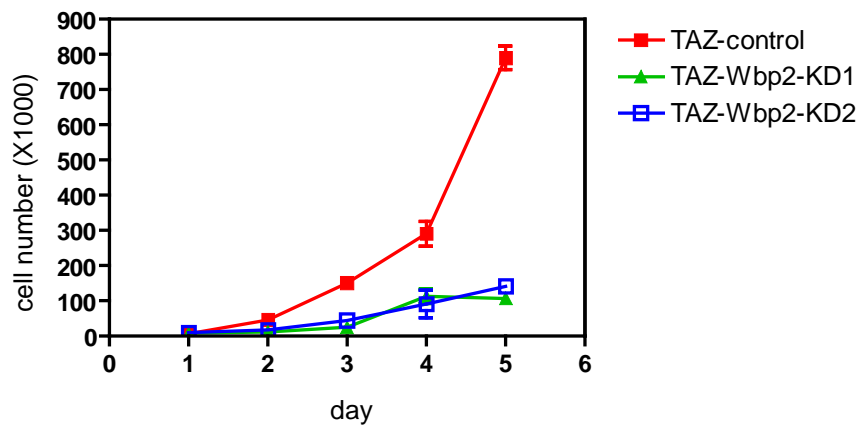

Figure S5

A

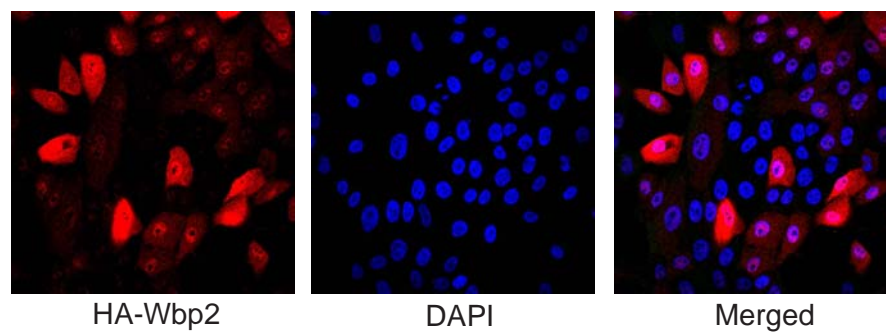

B

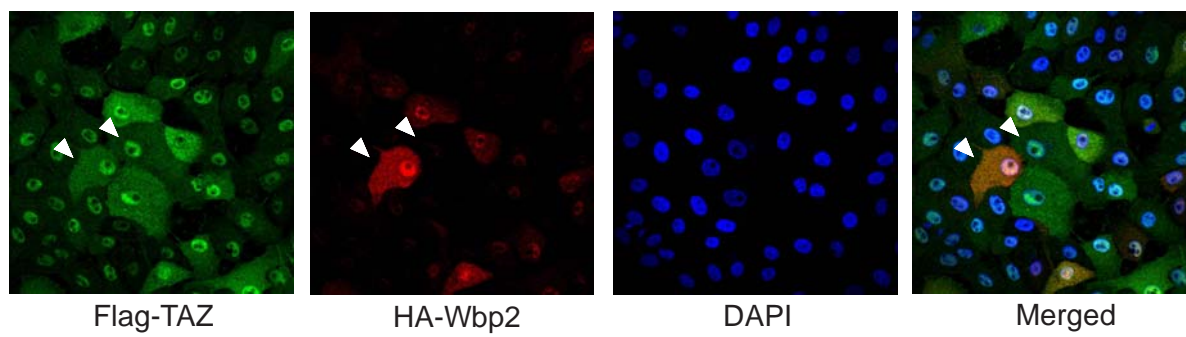

C

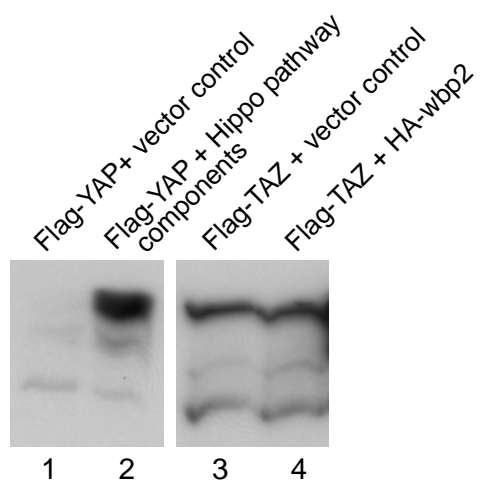

Figure S6

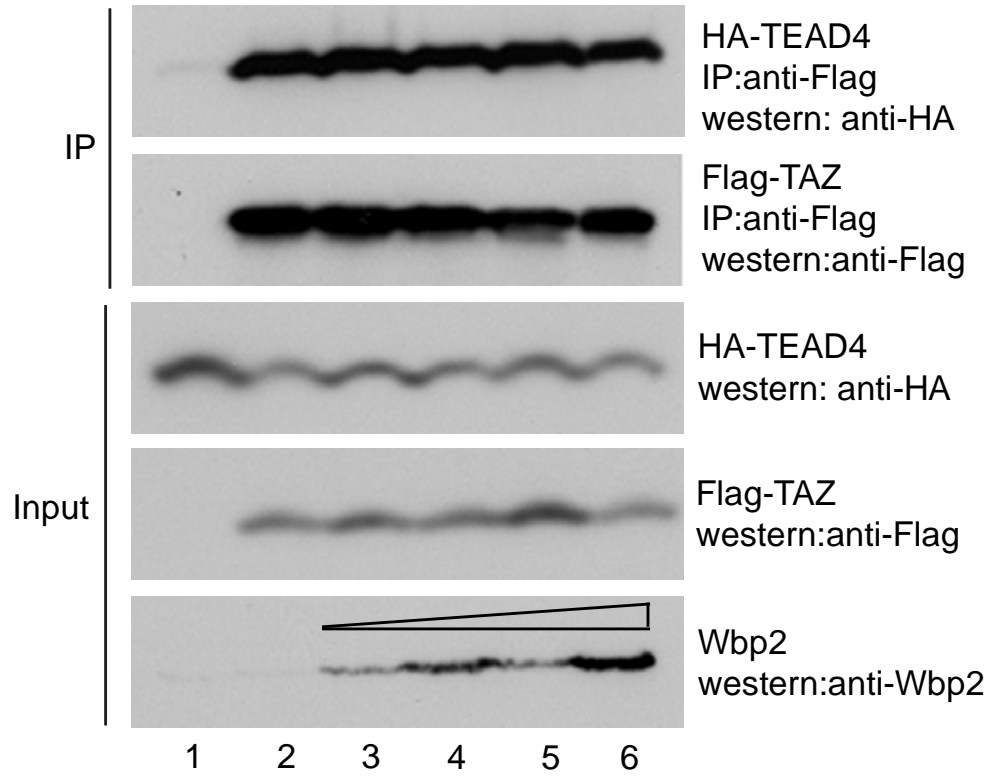

Figure S7

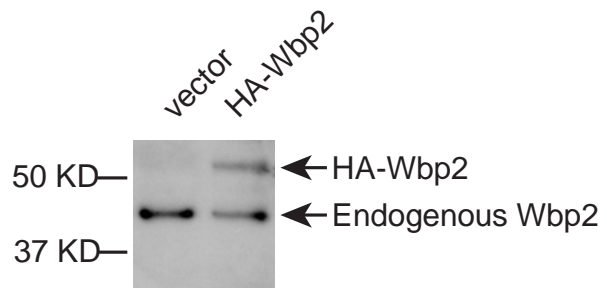

Supplement: onc2010438x1.pdf [file onc2010438x1.pdf]
